# Supplementary material for: Combinations of isoform-targeted histone deacetylase inhibitors and bryostatin analogues display remarkable potency to activate latent HIV without global T-cell activation
Source: PubMed Central journal article supplement (PMC5547048; doi:10.1038/s41598-017-07814-4), 2017-08-07
Supplement: 41598_2017_7814_MOESM1_ESM.pdf [file 41598_2017_7814_MOESM1_ESM.pdf]

Supplementary Information

**Combinations of isoform-targeted histone deacetylase inhibitors and bryostatin analogues display remarkable potency to activate latent HIV without global T-cell activation.**

Brice J. Albert, Austin Niu, Rashmi Ramani, Garland R. Marshall, Paul A. Wender, Robert M. Williams, Lee Ratner, Alexander B. Barnes, George B. Kyei

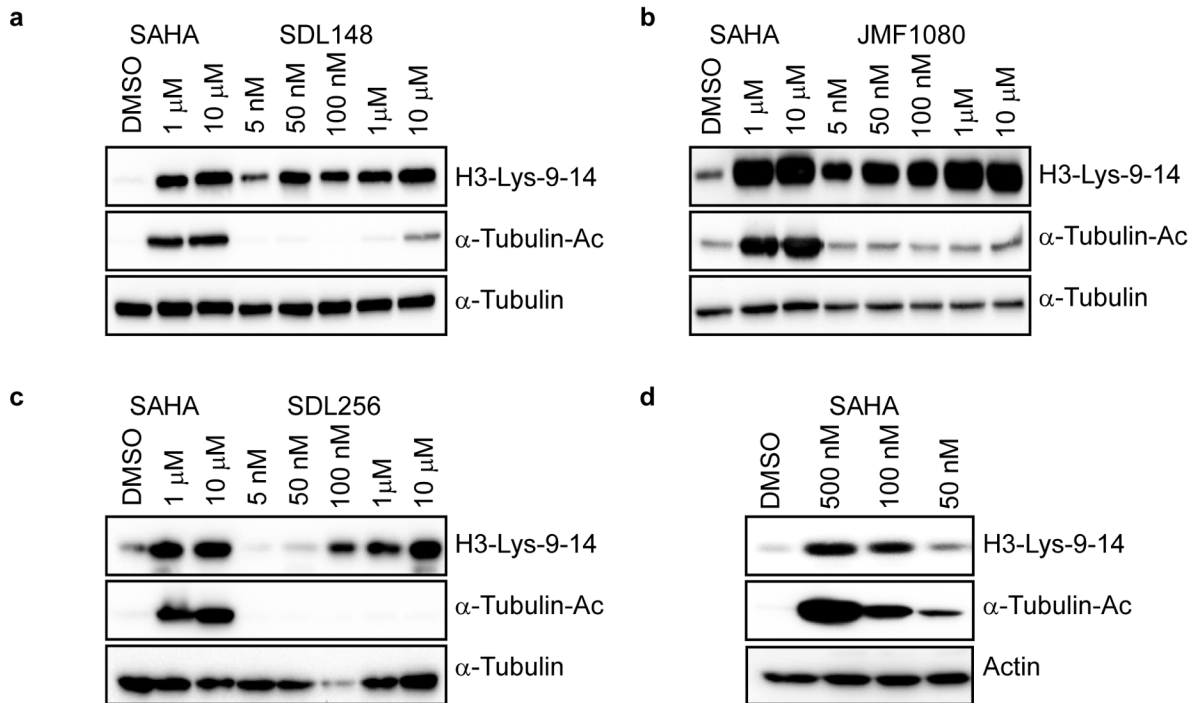

**Supplementary Figure S1. HDAC inhibition in HeLa and primary T-cells.**

Compounds at indicated concentrations were incubated with HeLa cells (**a-c**) or primary T-cells (**d**) for 8h and WB performed for acetylated histone H3 (a marker of class I HDAC inhibition) or acetylated tubulin (a marker for HDAC6, class II HDAC) inhibition. Related to Fig. 5.

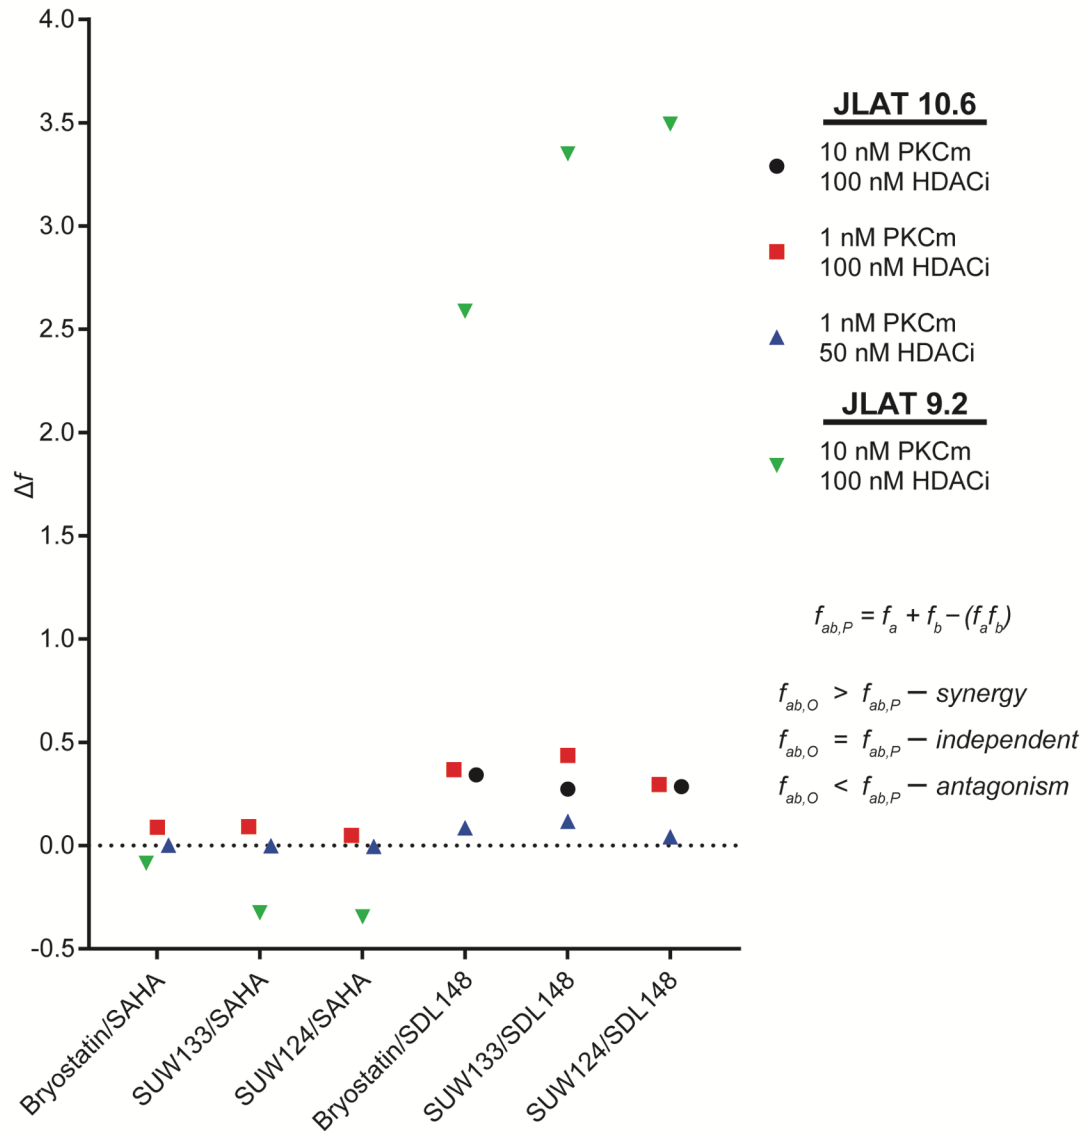

**Supplementary Figure S2. Combination LRA fractional differences per Bliss independence prediction.** The fractional difference ( $\Delta f$ ) is calculated by taking the difference between the observed fractional response ( $f_{ab,O}$ ) and the predicted fractional response ( $f_{ab,P}$ ) to determine if the two drugs are truly independent. The predicted fractional response ( $f_{ab,P}$ ) is found per the Bliss independence model by taking the observed fractional response of drug A ( $f_a$ ), adding it to the observed fractional response of drug B ( $f_b$ ) and subtracting the fractional response that might arise from a simultaneous response of drug A

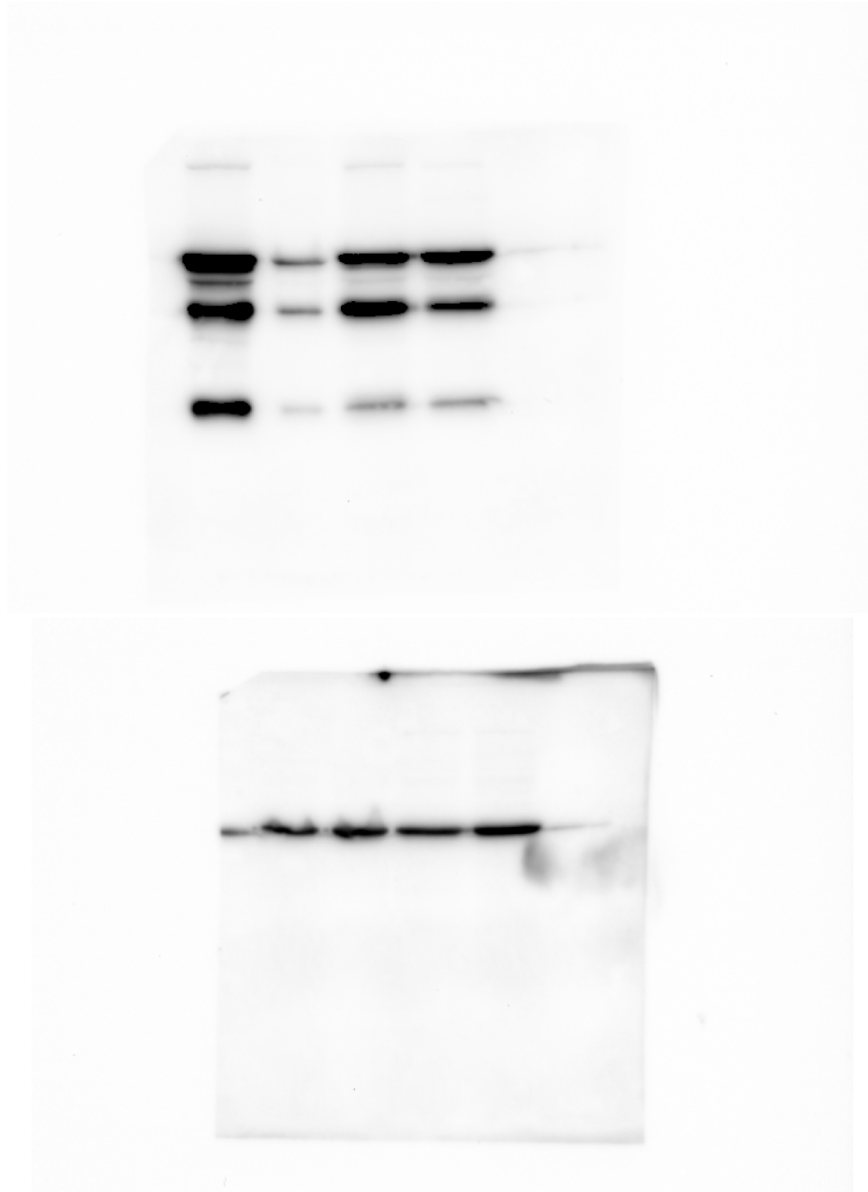

**Supplementary Figure S3. Full unedited gels shown in Figure 3D of manuscript. (Top) The right three lanes are shown in the figure. (Bottom) Actin blot for the same gel.**

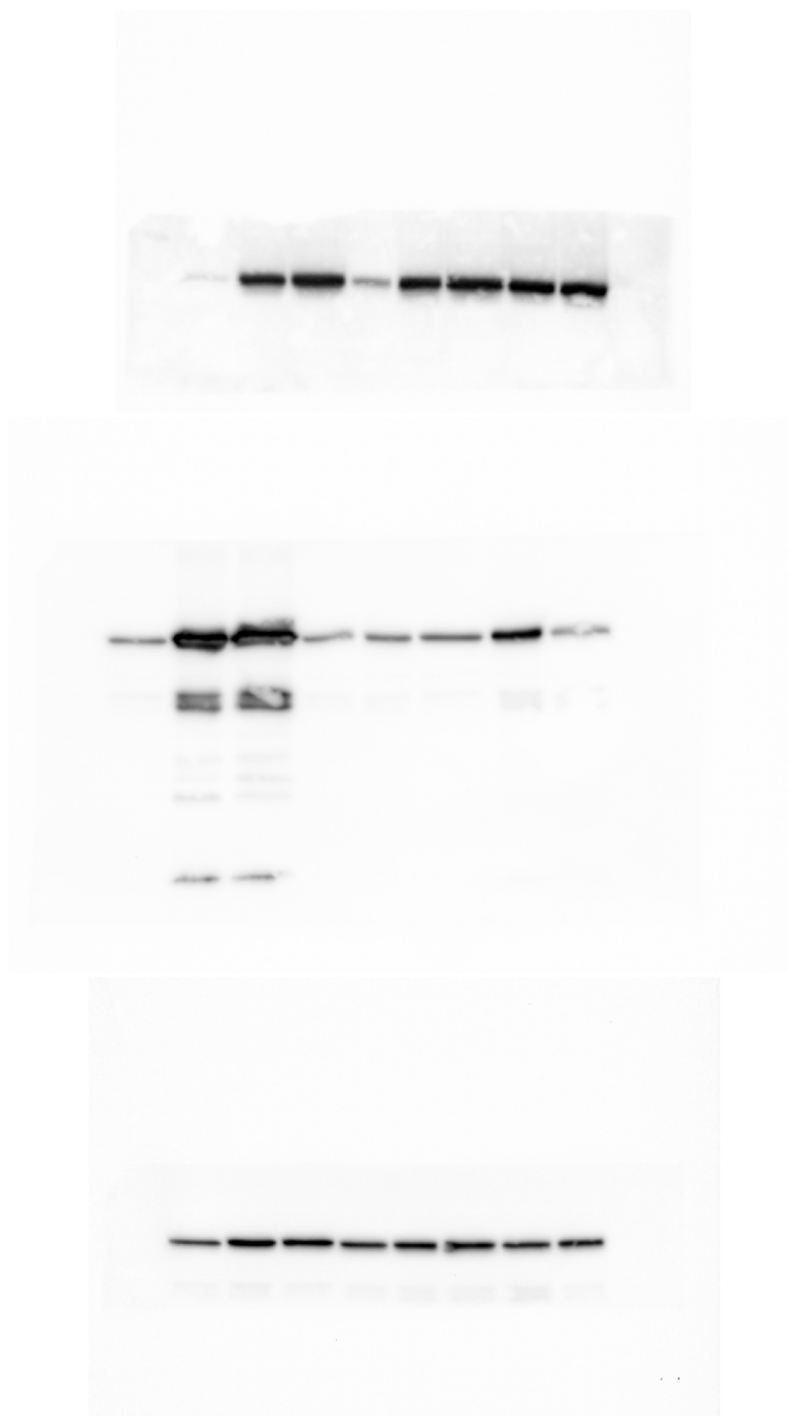

**Supplementary Figure S4. Full unedited gels shown in Figure 5a, left (SDL148) of manuscript. (top) H3-Lys-9-14. (center)  $\alpha$ -Tubulin-Ac. (bottom)  $\alpha$ -Tubulin**

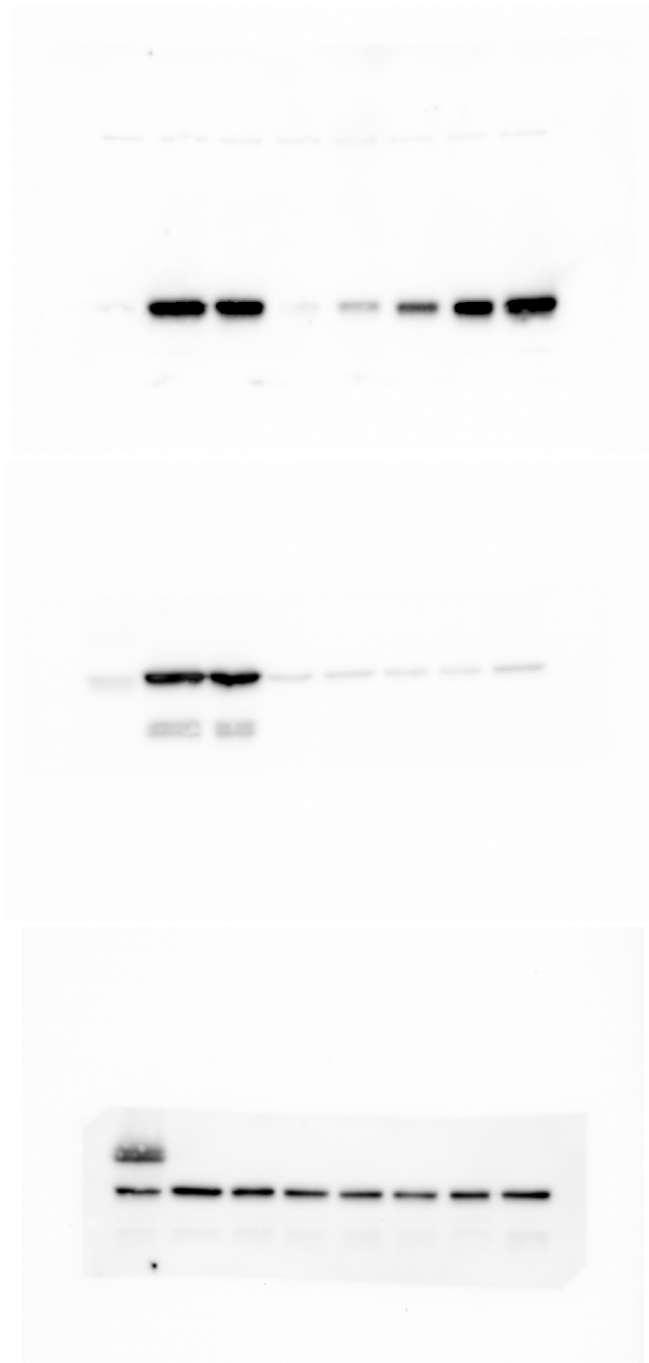

**Supplementary Figure S5. Full unedited gels shown in Figure 5a, center (JMF1080) of manuscript. (top) H3-Lys-9-14. (center)  $\alpha$ -Tubulin-Ac. (bottom)  $\alpha$ -Tubulin**

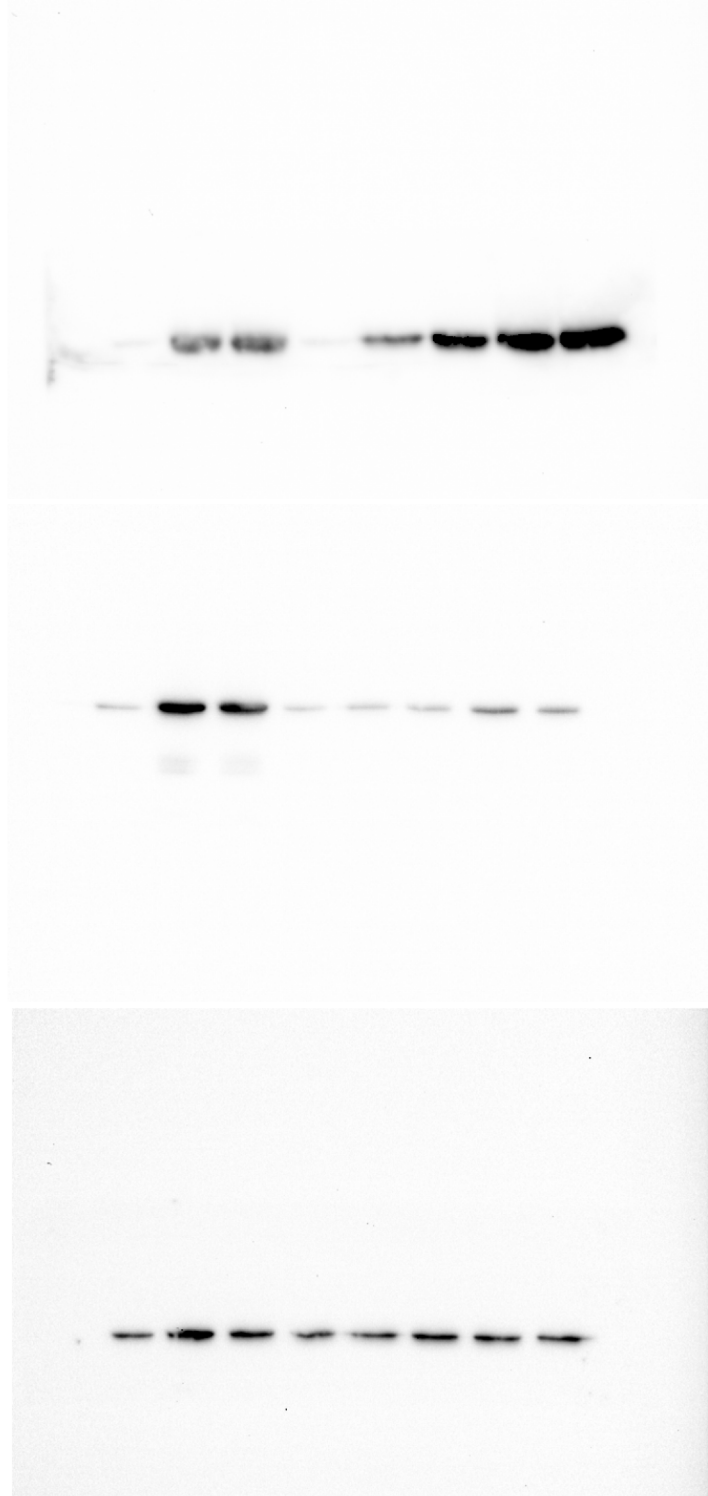

**Supplementary Figure S6. Full unedited gels shown in Figure 5a, right (SDL256) of manuscript. (top) H3-Lys-9-14. (center)  $\alpha$ -Tubulin-Ac. (bottom)  $\alpha$ -Tubulin**

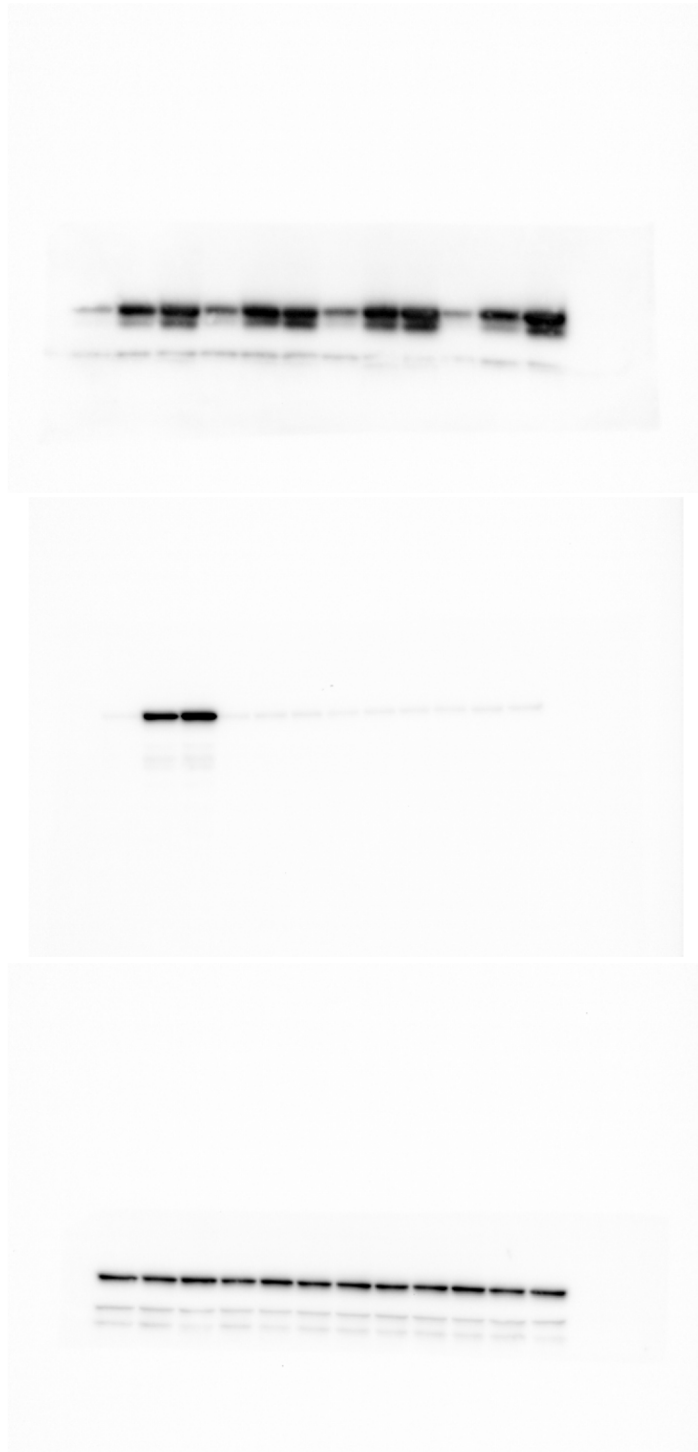

**Supplementary Figure S7. Full unedited gels shown in Figure 5b of manuscript. (top) H3-Lys-9-14. (center)  $\alpha$ -Tubulin-Ac. (bottom)  $\alpha$ -Tubulin**



**Supplementary Table 1. Compounds developed through virtual screening to be isoform-targeted HDAC inhibitors. Related to Figure 2.**

| Compounds | Molecular Structure                                                                  | Molecular Weight | clogP |
|-----------|--------------------------------------------------------------------------------------|------------------|-------|
| MC2984    | 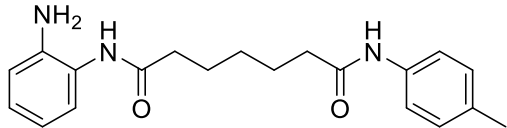   | 339.43           | 2.49  |
| SDM141    |     | 253.25           | 0.36  |
| SDM146    |     | 252.27           | -0.46 |
| MC2727    |   | 446.50           | 2.41  |
| MC2726    |  | 446.50           | 2.41  |
| MC2625    |  | 387.43           | 2.50  |
| MC2664    |  | 396.44           | 3.61  |
| MC2780    |  | 408.45           | 3.16  |

|        |                                                                                      |        |      |
|--------|--------------------------------------------------------------------------------------|--------|------|
| MC2776 | 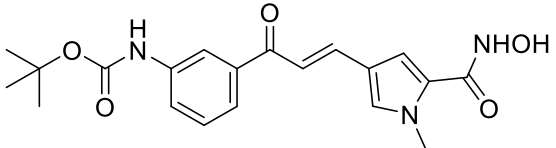   | 385.42 | 2.52 |
| MC3031 |    | 399.46 | 2.06 |
| MC3004 |     | 373.43 | 2.07 |
| MC3079 |   | 467.54 | 5.29 |
| MC3050 |  | 474.55 | 3.90 |
| MC1742 |  | 395.48 | 2.64 |
| MC1862 |   | 307.37 | 0.78 |

|                                        |                                                                                      |               |             |
|----------------------------------------|--------------------------------------------------------------------------------------|---------------|-------------|
| <p><b>MC2126</b></p>                   | 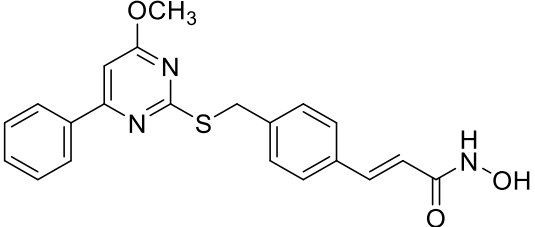   | <p>393.46</p> | <p>4.10</p> |
| <p><b>MC2129</b></p>                   |    | <p>397.88</p> | <p>3.90</p> |
| <p><b>JMF-1080</b></p>                 |    | <p>621.87</p> | <p>4.84</p> |
| <p><b>SD-L-256</b></p>                 |    | <p>532.67</p> | <p>1.92</p> |
| <p><b>SD-L-148<br/>(Largarole)</b></p> |  | <p>622.86</p> | <p>4.93</p> |
| <p><b>GRM1<br/>(SAHA)</b></p>          |  | <p>264.32</p> | <p>0.99</p> |
| <p><b>GRM2<br/>(tubastatin)</b></p>    |   | <p>335.41</p> | <p>2.13</p> |

|                                    |                                                                                                                                                                                                                                                                                                                                                                                                                                                                    |        |       |
|------------------------------------|--------------------------------------------------------------------------------------------------------------------------------------------------------------------------------------------------------------------------------------------------------------------------------------------------------------------------------------------------------------------------------------------------------------------------------------------------------------------|--------|-------|
| <b>GRM3</b><br><b>(entinostat)</b> | <p>The chemical structure of GRM3 (entinostat) is shown. It consists of a pyridine ring connected via a methylene group to an ester linkage (-O-C(=O)-NH-). This ester is further connected via a methylene group to a para-substituted benzene ring. This benzene ring is also connected via a methylene group to another ester linkage (-C(=O)-NH-), which is finally connected to a meta-substituted benzene ring bearing an amino group (-NH<sub>2</sub>).</p> | 376.42 | -0.12 |
|------------------------------------|--------------------------------------------------------------------------------------------------------------------------------------------------------------------------------------------------------------------------------------------------------------------------------------------------------------------------------------------------------------------------------------------------------------------------------------------------------------------|--------|-------|
